# Supplementary material for: Comparison of Attenuated and Virulent Strains of African Swine Fever Virus Genotype I and Serogroup 2
Source: MDPI journal article supplement (doi:10.3390/v15061373), 2023-06-14
Supplement: s1 [file s1]

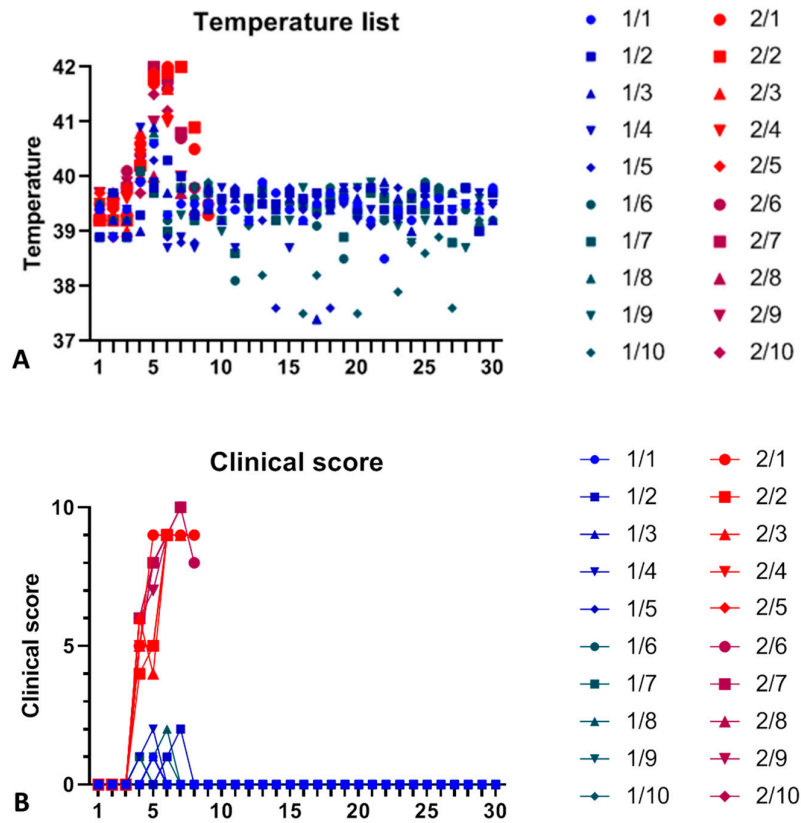

**Figure S1.** Body temperature (A), clinical signs (B) in pigs inoculated with ASFV strains Congo-a (KK262) and Congo-v (K49). Pigs were inoculated with Congo-a (strain KK-262) (#1/1-1/10) or Congo-v (strain K49) (#2/1-2/10). Data on body temperature and clinical score are given for individual animals from each group. The analysis was conducted using Graphpad Prism software version 8.0.1.

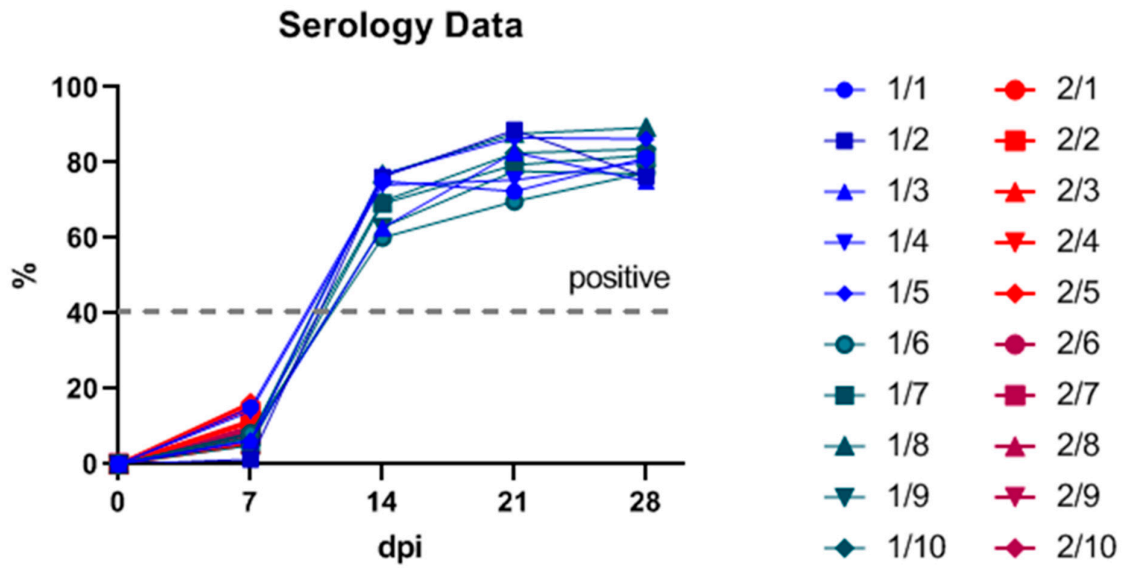

**Figure S2.** Antibody response to ASFV detected in pigs IM inoculated with  $10^6$  HAD50 ASFV Congo-a or  $10^3$  HAD50 ASFV Congo-v. Antibody responses to ASFV measured using ELISA in pigs immunized with ASFV Congo-a (#1/1-1/10) or Congo-v (#2/1-2/10) at 0–28 dpi. The dashed line indicates a threshold value of 40%. Data on antibody response to ASFV are given for individual animals from each group. The analysis was conducted using Graphpad Prism software version 8.0.1.

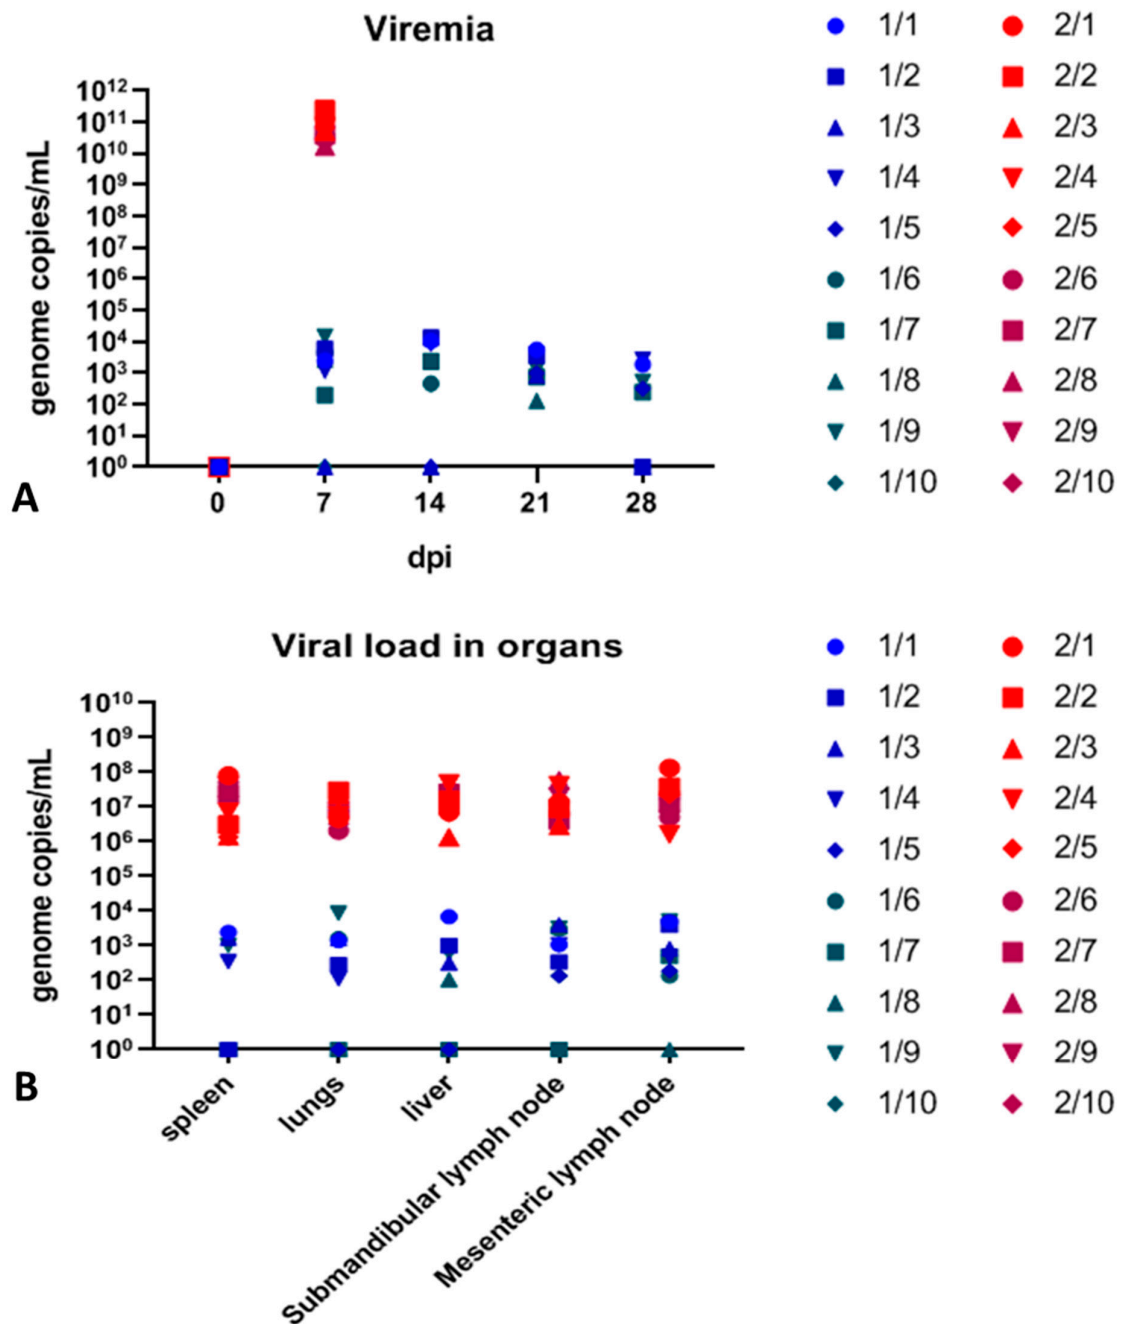

**Figure S3.** Kinetics of ASFV genomes in blood (A) and viral load in organs (B) detected in pigs IM inoculated with  $10^6$  HAD50 ASFV Congo-a (#1/1-1/10) or  $10^3$  HAD50 ASFV Congo-v (#2/1-2/10). The detection of the ASFV genome was conducted in blood (A) and organs (B) by the qPCR. The results are presented as genome copies/mL. Data on the amount of ASFV genome in blood and organ samples are given for individual animals from each group. The analysis was conducted using Graphpad Prism software version 8.0.1.
